# Supplementary material
Source: PubMed Central journal article supplement (PMC5087968)
Supplement: NIHMS811111-supplement-1.pdf [file NIHMS811111-supplement-1.pdf]

# **SUPPLEMENTAL MATERIAL**

## ***TP53* Mutational Spectrum in Endometrioid and Serous Endometrial Cancers**

**Schultheis et al.**

Supplemental Tables 1-5

Supplemental Figure 1

## SUPPLEMENTAL TABLES

**Supplemental Table 1.** Endometrial cancers harboring multiple *TP53* mutations.

| ID           | Histology    | FIGO grade | Integrative genomic subtype | <i>TP53</i> mutation | <i>TP53</i> hotspot mutation |
|--------------|--------------|------------|-----------------------------|----------------------|------------------------------|
| TCGA-BS-A0UV | Endometrioid | Grade 3    | POLE                        | R158C, R213*         | 0                            |
| TCGA-B5-A11N | Endometrioid | Grade 1    | POLE                        | R209I, T256fs        | 0                            |
| TCGA-D1-A16Y | Endometrioid | Grade 1    | POLE                        | R213Q, S241P         | 0                            |
| TCGA-AP-A059 | Endometrioid | Grade 3    | POLE                        | P64T, S240G, R273C   | 1                            |

POLE, POLE (ultramutated) integrative genomic subtype. Hotspot *TP53* mutations include R175, G245, R248, R249, R273 and R282.

**Supplemental Table 2.** *TP53* status in endometrioid endometrial carcinomas according to FIGO grade.

|            |         | Endometrioid endometrial carcinomas (n=186) |                        | p-value* |
|------------|---------|---------------------------------------------|------------------------|----------|
|            |         | Wild-type <i>TP53</i> (n)                   | Mutant <i>TP53</i> (n) |          |
| FIGO grade | Grade 1 | 68                                          | 2                      | <0.0001  |
|            | Grade 2 | 72                                          | 8                      |          |
|            | Grade 3 | 46                                          | 17                     |          |

\*; Chi-squared p-value; n=number of cases

**Supplemental Table 3.** *TP53* status of endometrial cancers of copy-number high integrative genomic subtype and co-occurrence with somatic mutations in genes frequently altered in endometrial cancers.

|                              |            | <b>CN-high endometrioid<br/>(n=16)</b>                    | <b>CN-high serous<br/>(n=41)</b>                     | <b>p-value*</b> |
|------------------------------|------------|-----------------------------------------------------------|------------------------------------------------------|-----------------|
| <i>TP53</i> mutation         |            | 15 (94%)                                                  | 37 (90%)                                             | 1.0             |
| Type of <i>TP53</i> mutation | Frameshift | 2                                                         | 4                                                    | 1.0             |
|                              | Missense   | 12                                                        | 29                                                   |                 |
|                              | Nonsense   | 1                                                         | 3                                                    |                 |
|                              | Splice     | 0                                                         | 1                                                    |                 |
| Hotspot <i>TP53</i> mutation | No         | 12                                                        | 24                                                   | 0.2096          |
|                              | Yes        | 3                                                         | 17                                                   |                 |
| <i>ARID1A</i> gene status    | Wild-type  | 16                                                        | 38                                                   | 0.5516          |
|                              | Mutant     | 0                                                         | 3                                                    |                 |
| <i>FBXW7</i> gene status     | Wild-type  | 16                                                        | 28                                                   | 0.0116          |
|                              | Mutant     | 0                                                         | 13                                                   |                 |
| <i>PPP2R1A</i> gene status   | Wild-type  | 15                                                        | 30                                                   | 0.1477          |
|                              | Mutant     | 1                                                         | 11                                                   |                 |
| <i>PTEN</i> gene status      | Wild-type  | 11                                                        | 40                                                   | 0.0052          |
|                              | Mutant     | 5                                                         | 1                                                    |                 |
|                              |            | <b>CN-high <i>TP53</i>-mutant<br/>endometrioid (n=15)</b> | <b>CN-high <i>TP53</i>-<br/>mutant serous (n=37)</b> | <b>p-value*</b> |
| <i>ARID1A</i> gene status    | Wild-type  | 15                                                        | 34                                                   | 0.5480          |
|                              | Mutant     | 0                                                         | 3                                                    |                 |
| <i>FBXW7</i> gene status     | Wild-type  | 15                                                        | 36                                                   | 0.0518          |
|                              | Mutant     | 0                                                         | 11                                                   |                 |
| <i>PPP2R1A</i> gene status   | Wild-type  | 14                                                        | 27                                                   | 0.1447          |
|                              | Mutant     | 1                                                         | 10                                                   |                 |
| <i>PTEN</i> gene status      | Wild-type  | 10                                                        | 36                                                   | 0.0057          |
|                              | Mutant     | 5                                                         | 1                                                    |                 |

\*, Fisher's exact test p-value

CN-high, copy-number high (serous-like) integrative genomic subtype. Hotspot *TP53* mutations include R175, G245, R248, R249, R273 and R282.

**Supplemental Table 4.** Prevalence of somatic mutations in genes frequently altered in *TP53* wild-type and *TP53*-mutant endometrioid and serous endometrial carcinomas.

|                            | <b>All endometrioid (n=186)</b>                                   | <b>All serous (n=42)</b>                        | <b>p-value*</b> |
|----------------------------|-------------------------------------------------------------------|-------------------------------------------------|-----------------|
| <i>ARID1A</i> gene status  | 73/186 (39%)                                                      | 4/42 (10%)                                      | 0.0001          |
| <i>PTEN</i> gene status    | 146/186 (78%)                                                     | 1/42 (2%)                                       | <0.0001         |
| <i>FBXW7</i> gene status   | 23/186 (12%)                                                      | 14/42 (33%)                                     | 0.00206         |
| <i>PPP2R1A</i> gene status | 13/186 (7%)                                                       | 11/42 (26%)                                     | 0.00098         |
|                            | <b><i>TP53</i> wild-type endometrioid (n=159)</b>                 | <b><i>TP53</i> wild-type serous (n=5)</b>       | <b>p-value*</b> |
| <i>ARID1A</i> gene status  | 69/159 (43%)                                                      | 1/5 (20%)                                       | 0.3944          |
| <i>PTEN</i> gene status    | 129/159 (81%)                                                     | 0/5 (0%)                                        | 0.0003          |
| <i>FBXW7</i> gene status   | 20/159 (13%)                                                      | 3/5 (60%)                                       | 0.0202          |
| <i>PPP2R1A</i> gene status | 11/159 (7%)                                                       | 1/5 (20%)                                       | 0.3194          |
|                            | <b><i>TP53</i>-mutant endometrioid (n=27)</b>                     | <b><i>TP53</i>-mutant serous (n=37)</b>         | <b>p-value*</b> |
| <i>ARID1A</i> gene status  | 4/27 (15%)                                                        | 3/37 (8%)                                       | 0.4427          |
| <i>PTEN</i> gene status    | 17/27 (63%)                                                       | 1/37 (3%)                                       | 0.0001          |
| <i>FBXW7</i> gene status   | 3/27 (11%)                                                        | 11/37 (30%)                                     | 0.1247          |
| <i>PPP2R1A</i> gene status | 2/27 (7%)                                                         | 10/37 (27%)                                     | 0.0578          |
|                            | <b>FIGO grade 3 <i>TP53</i>-mutant endometrioid (n=17)</b>        | <b><i>TP53</i>-mutant serous (n=37)</b>         | <b>p-value*</b> |
| <i>ARID1A</i> gene status  | 4/17 (24%)                                                        | 3/37 (8%)                                       | 0.1885          |
| <i>PTEN</i> gene status    | 10/17 (59%)                                                       | 1/37 (3%)                                       | 0.0001          |
| <i>FBXW7</i> gene status   | 1/17 (6%)                                                         | 11/37 (30%)                                     | 0.0778          |
| <i>PPP2R1A</i> gene status | 1/17 (6%)                                                         | 10/37 (27%)                                     | 0.1427          |
|                            | <b>CN-high FIGO grade 3 <i>TP53</i>-mutant endometrioid (n=9)</b> | <b>CN-high <i>TP53</i>-mutant serous (n=37)</b> | <b>p-value*</b> |
| <i>ARID1A</i> gene status  | 0/9 (0%)                                                          | 3/37 (8%)                                       | 1.0             |
| <i>PTEN</i> gene status    | 2/9 (22%)                                                         | 1/37 (3%)                                       | 0.0933          |
| <i>FBXW7</i> gene status   | 0/9 (0%)                                                          | 11/37 (30%)                                     | 0.0890          |
| <i>PPP2R1A</i> gene status | 0/9 (0%)                                                          | 10/37 (27%)                                     | 0.1722          |

\*, Fisher's exact test p-value

CN-high, copy-number high (serous-like) integrative genomic subtype.

**Supplemental Table 5.** Clinico-pathologic characteristics of and genomic alterations in *TP53* wild-type serous endometrial carcinomas.

| TCGA ID      | FIGO stage | MSI status | Integrative genomic subtype | Non-synonymous mutations (n)* | Copy number altered genes (n)* | Genes mutated preferentially in SECs**           | Genes mutated preferentially in EECs**                              |
|--------------|------------|------------|-----------------------------|-------------------------------|--------------------------------|--------------------------------------------------|---------------------------------------------------------------------|
| TCGA-B5-A1MY | III        | MSS        | CN-high                     | 43                            | 238                            |                                                  |                                                                     |
| TCGA-AX-A1C7 | I          | MSS        | CN-high                     | 40                            | 303                            | <i>FBXW7</i>                                     |                                                                     |
| TCGA-B5-A0K8 | I          | MSS        | CN-high                     | 41                            | 1133                           | <i>PPP2R1A</i>                                   |                                                                     |
| TCGA-D1-A0ZP | IV         | MSI-L      | CN-high                     | 30                            | 1077                           | <i>FBXW7</i> ,<br><i>CHD4</i> ,<br><i>PIK3CA</i> | <i>PIK3CA</i>                                                       |
| TCGA-D1-A15X | I          | MSI-L      | CN-low                      | 1324                          | 5                              | <i>FBXW7</i> ,<br><i>PIK3CA</i>                  | <i>KRAS</i> ,<br><i>ARID1A</i> ,<br><i>PIK3CA</i> ,<br><i>FGFR2</i> |

CN-high, copy-number high (serous-like) integrative genomic subtype; CN-low, copy-number low (serous-like) integrative genomic subtype; EEC, endometrioid endometrial cancer; MSI, microsatellite instability; MSI-L, low level microsatellite instability; MSS, microsatellite stable; SEC, serous endometrial cancer. \*information retrieved from [www.cBioPortal.org](http://www.cBioPortal.org) (April 2015); \*\*\*according to the significantly mutated genes reported in The Cancer Genome Atlas study, Nature 2013.

**Supplemental Figure 1**

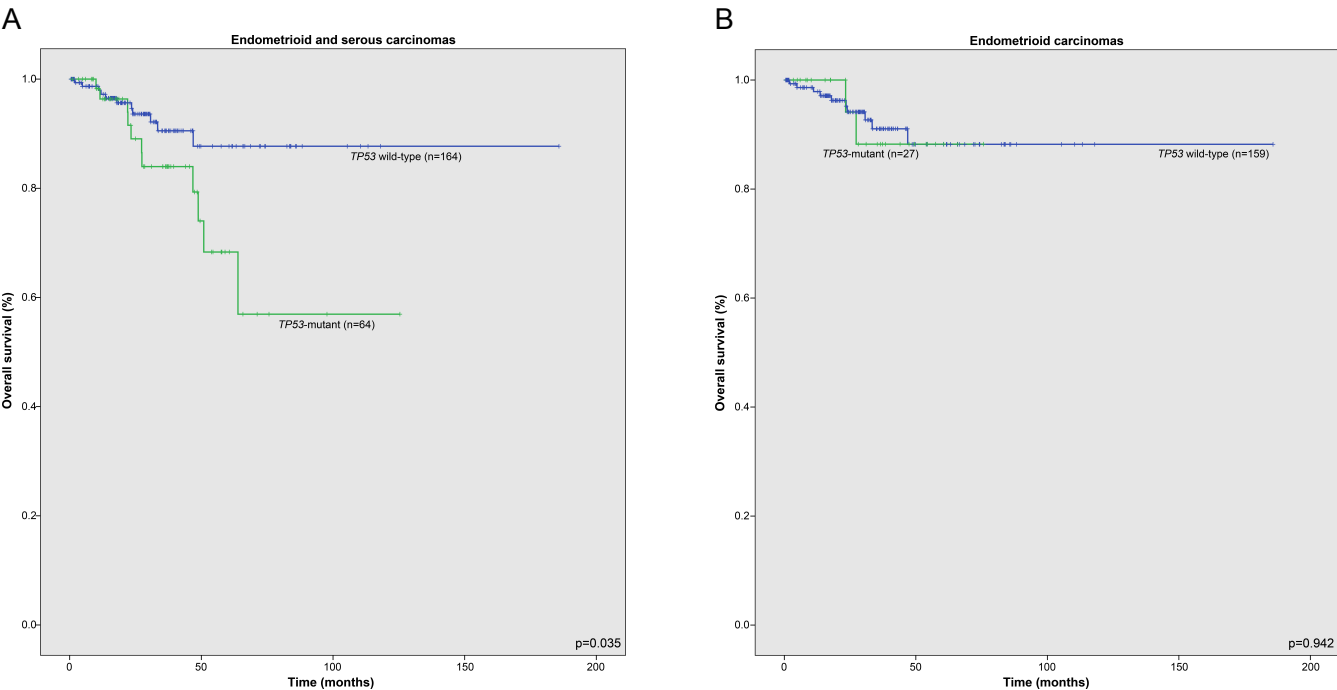

**Supplemental Fig. 1.** Kaplan-Meier overall survival curves for endometrial carcinomas. (A) Kaplan-Meier overall survival curve for all 228 endometrioid and serous endometrial carcinomas included in this study stratified by *TP53* mutation status. (B) Kaplan-Meier overall survival curve for the 186 endometrioid endometrial carcinomas included in this study stratified by *TP53* mutation status.
